# Supplementary material for: Synthesis, crystal structures and spectroscopic properties of pure YSb2O4Br and YSb2O4Cl as well as Eu3+- and Tb3+-doped samples
Source: Royal Society of Chemistry journal article supplement (doi:10.1039/d1ra08382a), 2021-12-22

---

The following ALERTS were generated. Each ALERT has the format  
**test-name\_ALERT\_alert-type\_alert-level.**

Click on the hyperlinks for more details of the test.

---

 **Alert level B**

PLAT971\_ALERT\_2\_B Check Calcd Resid. Dens. 0.92A From Sb1 2.82 eA-3

---

 **Alert level C**

RINTA01\_ALERT\_3\_C The value of Rint is greater than 0.12  
Rint given 0.132

|                   |                                           |                       |        |            |
|-------------------|-------------------------------------------|-----------------------|--------|------------|
| PLAT199_ALERT_1_C | Reported _cell_measurement_temperature    | ..... (K)             | 293    | Check      |
| PLAT200_ALERT_1_C | Reported _diffrn_ambient_temperature      | ..... (K)             | 293    | Check      |
| PLAT213_ALERT_2_C | Atom O1                                   | has ADP max/min Ratio | .....  | 3.3 prolat |
| PLAT906_ALERT_3_C | Large K Value in the Analysis of Variance | .....                 | 13.665 | Check      |
| PLAT906_ALERT_3_C | Large K Value in the Analysis of Variance | .....                 | 2.830  | Check      |
| PLAT971_ALERT_2_C | Check Calcd Resid. Dens.                  | 0.76A From Sb2        | 1.51   | eA-3       |
| PLAT972_ALERT_2_C | Check Calcd Resid. Dens.                  | 0.69A From Sb1        | -1.70  | eA-3       |
| PLAT973_ALERT_2_C | Check Calcd Positive Resid. Density on    | Sb1                   | 1.14   | eA-3       |

---

 **Alert level G**

|                   |                                                  |         |       |             |
|-------------------|--------------------------------------------------|---------|-------|-------------|
| PLAT004_ALERT_5_G | Polymeric Structure Found with Maximum Dimension |         | 2     | Info        |
| PLAT005_ALERT_5_G | No Embedded Refinement Details Found in the CIF  |         |       | Please Do ! |
| PLAT020_ALERT_3_G | The Value of Rint is Greater Than 0.12           | .....   | 0.132 | Report      |
| PLAT045_ALERT_1_G | Calculated and Reported Z Differ by a Factor     | ...     | 0.50  | Check       |
| PLAT794_ALERT_5_G | Tentative Bond Valency for Sb1                   | (III) . | 2.89  | Info        |
| PLAT794_ALERT_5_G | Tentative Bond Valency for Sb2                   | (III) . | 2.71  | Info        |
| PLAT794_ALERT_5_G | Tentative Bond Valency for Y                     | (III) . | 3.02  | Info        |
| PLAT899_ALERT_4_G | SHELXL97 is Deprecated and Succeeded by SHELXL/  |         | 2018  | Note        |
| PLAT912_ALERT_4_G | Missing # of FCF Reflections Above STh/L=        | 0.600   | 19    | Note        |

---

- 0 **ALERT level A** = Most likely a serious problem - resolve or explain  
1 **ALERT level B** = A potentially serious problem, consider carefully  
9 **ALERT level C** = Check. Ensure it is not caused by an omission or oversight  
9 **ALERT level G** = General information/check it is not something unexpected

- 3 ALERT type 1 CIF construction/syntax error, inconsistent or missing data  
5 ALERT type 2 Indicator that the structure model may be wrong or deficient  
4 ALERT type 3 Indicator that the structure quality may be low  
2 ALERT type 4 Improvement, methodology, query or suggestion  
5 ALERT type 5 Informative message, check
-

It is advisable to attempt to resolve as many as possible of the alerts in all categories. Often the minor alerts point to easily fixed oversights, errors and omissions in your CIF or refinement strategy, so attention to these fine details can be worthwhile. In order to resolve some of the more serious problems it may be necessary to carry out additional measurements or structure refinements. However, the purpose of your study may justify the reported deviations and the more serious of these should normally be commented upon in the discussion or experimental section of a paper or in the "special\_details" fields of the CIF. checkCIF was carefully designed to identify outliers and unusual parameters, but every test has its limitations and alerts that are not important in a particular case may appear. Conversely, the absence of alerts does not guarantee there are no aspects of the results needing attention. It is up to the individual to critically assess their own results and, if necessary, seek expert advice.

### **Publication of your CIF in IUCr journals**

A basic structural check has been run on your CIF. These basic checks will be run on all CIFs submitted for publication in IUCr journals (*Acta Crystallographica*, *Journal of Applied Crystallography*, *Journal of Synchrotron Radiation*); however, if you intend to submit to *Acta Crystallographica Section C* or *E* or *IUCrData*, you should make sure that full publication checks are run on the final version of your CIF prior to submission.

### **Publication of your CIF in other journals**

Please refer to the *Notes for Authors* of the relevant journal for any special instructions relating to CIF submission.

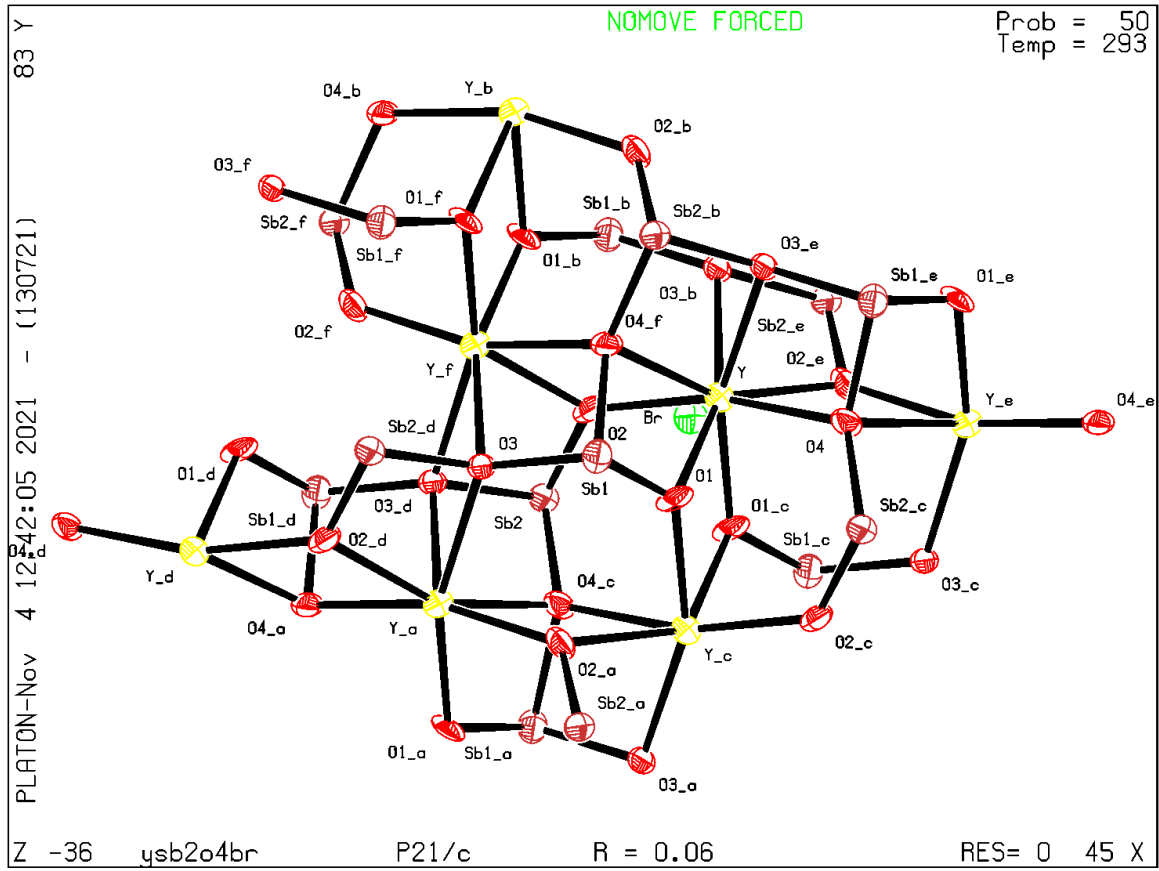

Supplement: d1ra08382a1.pdf [file d1ra08382a1.pdf]
