# Supplementary material for: Synthesis, crystal structures and spectroscopic properties of pure YSb2O4Br and YSb2O4Cl as well as Eu3+- and Tb3+-doped samples
Source: Royal Society of Chemistry journal article supplement (doi:10.1039/d1ra08382a), 2021-12-22

---

The following ALERTS were generated. Each ALERT has the format

**test-name\_ALERT\_alert-type\_alert-level.**

Click on the hyperlinks for more details of the test.

---

● **Alert level C**

STRVA01\_ALERT\_4\_C Flack test results are ambiguous.  
From the CIF: `_refine_ls_abs_structure_Flack` 0.450  
From the CIF: `_refine_ls_abs_structure_Flack_su` 0.060  
PLAT199\_ALERT\_1\_C Reported `_cell_measurement_temperature` ..... (K) 293 Check  
PLAT200\_ALERT\_1\_C Reported `_diffrn_ambient_temperature` ..... (K) 293 Check  
PLAT971\_ALERT\_2\_C Check Calcd Resid. Dens. 0.79A From Sb 1.77 eA-3  
PLAT972\_ALERT\_2\_C Check Calcd Resid. Dens. 0.75A From Sb -1.67 eA-3  
PLAT975\_ALERT\_2\_C Check Calcd Resid. Dens. 0.96A From O2 0.79 eA-3  
PLAT976\_ALERT\_2\_C Check Calcd Resid. Dens. 0.85A From O1 -0.72 eA-3

---

● **Alert level G**

PLAT004\_ALERT\_5\_G Polymeric Structure Found with Maximum Dimension 3 Info  
PLAT005\_ALERT\_5\_G No Embedded Refinement Details Found in the CIF Please Do !  
PLAT033\_ALERT\_4\_G Flack x Value Deviates > 3.0 \* sigma from Zero . 0.450 Note  
PLAT112\_ALERT\_2\_G ADDSYM Detects New (Pseudo) Symm. Elem m 85 %Fit  
PLAT112\_ALERT\_2\_G ADDSYM Detects New (Pseudo) Symm. Elem a 85 %Fit  
PLAT112\_ALERT\_2\_G ADDSYM Detects New (Pseudo) Symm. Elem m 85 %Fit  
PLAT112\_ALERT\_2\_G ADDSYM Detects New (Pseudo) Symm. Elem a 85 %Fit  
PLAT152\_ALERT\_1\_G The Supplied and Calc. Volume s.u. Differ by ... 2 Units  
PLAT794\_ALERT\_5\_G Tentative Bond Valency for Sb (III) . 2.79 Info  
PLAT794\_ALERT\_5\_G Tentative Bond Valency for Y1 (III) . 3.03 Info  
PLAT794\_ALERT\_5\_G Tentative Bond Valency for Y2 (III) . 3.00 Info  
PLAT899\_ALERT\_4\_G SHELXL97 is Deprecated and Succeeded by SHELXL/ 2018 Note

---

0 **ALERT level A** = Most likely a serious problem - resolve or explain  
0 **ALERT level B** = A potentially serious problem, consider carefully  
7 **ALERT level C** = Check. Ensure it is not caused by an omission or oversight  
12 **ALERT level G** = General information/check it is not something unexpected

3 ALERT type 1 CIF construction/syntax error, inconsistent or missing data  
8 ALERT type 2 Indicator that the structure model may be wrong or deficient  
0 ALERT type 3 Indicator that the structure quality may be low  
3 ALERT type 4 Improvement, methodology, query or suggestion  
5 ALERT type 5 Informative message, check

---

---

It is advisable to attempt to resolve as many as possible of the alerts in all categories. Often the minor alerts point to easily fixed oversights, errors and omissions in your CIF or refinement strategy, so attention to these fine details can be worthwhile. In order to resolve some of the more serious problems it may be necessary to carry out additional measurements or structure refinements. However, the purpose of your study may justify the reported deviations and the more serious of these should normally be commented upon in the discussion or experimental section of a paper or in the "special\_details" fields of the CIF. checkCIF was carefully designed to identify outliers and unusual parameters, but every test has its limitations and alerts that are not important in a particular case may appear. Conversely, the absence of alerts does not guarantee there are no aspects of the results needing attention. It is up to the individual to critically assess their own results and, if necessary, seek expert advice.

### **Publication of your CIF in IUCr journals**

A basic structural check has been run on your CIF. These basic checks will be run on all CIFs submitted for publication in IUCr journals (*Acta Crystallographica*, *Journal of Applied Crystallography*, *Journal of Synchrotron Radiation*); however, if you intend to submit to *Acta Crystallographica Section C* or *E* or *IUCrData*, you should make sure that full publication checks are run on the final version of your CIF prior to submission.

### **Publication of your CIF in other journals**

Please refer to the *Notes for Authors* of the relevant journal for any special instructions relating to CIF submission.

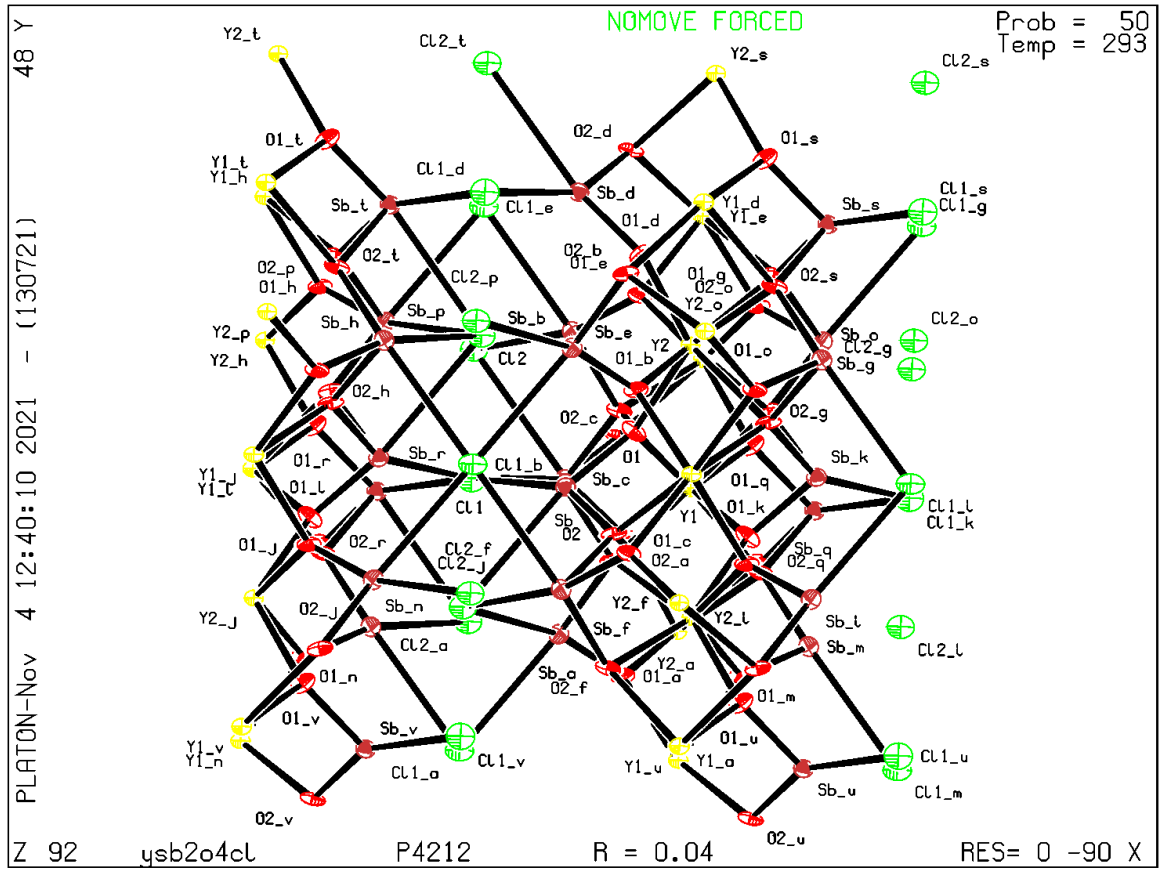

Supplement: d1ra08382a2.pdf [file d1ra08382a2.pdf]
